# 1    **The African Swine Fever Isolate ASFV-Kenya-1033-IX is highly** 2    **virulent and stable after growth in the wild boar cell line WSL**

3    Johanneke D. Hemmink<sup>1\*</sup>, Hussein M. Abkallo<sup>1</sup>, Sonal P. Henson<sup>1</sup>, Emmanuel M.  
4    Khazalwa<sup>1</sup>, Bernard Oduor<sup>1</sup>, Anna Lacasta<sup>1</sup>, Edward Okoth<sup>1</sup>, Walter Fuchs<sup>2</sup>, Richard  
5    P. Bishop<sup>1</sup>, Lucilla Steinaa<sup>1\*</sup>

6    <sup>1</sup> Animal and Human Health Program, International Livestock Research Institute, Nairobi, Kenya.

7    <sup>2</sup> Institute of Molecular Virology and Cell Biology, Friedrich-Loeffler-Institute, Federal Research Institute  
8    for Animal Health, Greifswald-Insel Riems, Germany

9    \*Corresponding authors: Johanneke D. Hemmink (e-mail: H.Hemmink@cgiar.org) and Lucilla Steinaa  
10    (e-mail: L.Steinaa@cgiar.org)

11

## 12    **Abstract**

13    In this study, we describe an African swine fever genotype IX virus (ASFV-Kenya-  
14    1033-IX), which was isolated from a domestic pig in Western Kenya during a reported  
15    outbreak, including efficiency of virus replication, *in vivo* virulence, and genome  
16    stability in pulmonary alveolar macrophages (PAM) and in a wild boar cell line (WSL).  
17    The ASFV-Kenya-1033-IX stock, which underwent multiple passages in WSL (more  
18    than 20), retained its ability to replicate in primary macrophages and it also retained  
19    the virulence *in vivo*. At the genomic level, only a few single nucleotide differences  
20    were observed between the macrophage and WSL-grown virus. Thus, we propose  
21    that the WSL cell line is suitable to produce live attenuated ASFV vaccine candidates  
22    based on this isolate and probably of similar viruses. The genome sequences for  
23    ASFV-Kenya-1033-IX grown in macrophages and in WSL cells was submitted to  
24    GenBank and a challenge model based on this isolate was set up, which will aid the  
25    development of vaccines against genotype IX ASFV circulating in Eastern and Central  
26    Africa.

## 27 **Introduction**

28 African swine fever (ASF) is a hemorrhagic disease of pigs, which causes up to 100%  
29 mortality. Although ASFV has been endemic in sub-Saharan Africa (SSA) for decades,  
30 other parts of the world are also affected. In SSA, several genotypes circulate  
31 simultaneously, e.g., five genotypes are found in Tanzania and neighboring countries  
32 between 2005 and 2018 (Reviewed by (Hakizimana *et al.*, 2021). Genotype IX and X  
33 are most common in Eastern Africa, but genotype II and XV have also been found  
34 (Bishop *et al.*, 2015; Abworo *et al.*, 2017; Norbert Mwiine *et al.*, 2019; Njau *et al.*, 2021;  
35 Peter *et al.*, 2021). Following the initial spread of genotype I ASFV to Europe in the  
36 1950's and subsequent eradication (except for Sardinia), a genotype II ASFV was  
37 introduced into Europe in 2007, which has been spreading subsequently in Europe,  
38 Asia and The Americas (OIE report 2007). In the absence of available treatments and  
39 licensed vaccines, ASFV is thus posing a global threat to the pig industry.

40 Efforts are being made to develop vaccines against this devastating virus, with most  
41 efforts geared towards genotype II ASFV, which is circulating in Europe and Asia. The  
42 most promising candidate vaccines are live-attenuated African swine fever viruses  
43 (LA-ASFV), which have shown to provide up to 100% protection against challenge  
44 with pathogenic ASFV (King *et al.*, 2011; O'Donnell *et al.*, 2015; Monteagudo *et al.*,  
45 2017; Reis *et al.*, 2017; Borca *et al.*, 2020). The live-attenuated viruses show reduced  
46 virulence due to deletion of genes associated with virulence, either naturally (King *et al.*  
47 *et al.*, 2011) by passage in tissue culture (Krug *et al.*, 2015; Rodríguez *et al.*, 2015) or by  
48 genetic modification techniques (Reis *et al.*, 2016; Borca *et al.*, 2018; Sánchez-Cordón  
49 *et al.*, 2018, Abkallo *et al.* 2021).

50 One of the challenges with the development of LA-ASFV is the difficulty of growing  
51 ASFV *in vitro*. ASFV is normally grown in primary cells, such as blood derived  
52 macrophages or pulmonary alveolar macrophages. However, the use of a continuous  
53 growing production cell line is desirable, which allows better quality control and limits  
54 the chances of introducing unwanted contaminants or pathogens. However, prolonged  
55 passage in tissue culture can alter the ASFV genome, the *in vitro* characteristics of the  
56 virus and/or the *in vivo* characteristics (Krug *et al.*, 2015; Rodríguez *et al.*, 2015; Borca  
57 *et al.*, 2021). Here, we describe ASFV-Kenya-1033-IX, an ASFV genotype IX, which  
58 was obtained from a domestic pig in Western Kenya during a reported outbreak of  
59 African swine fever, including *in vitro* virus growth, *in vivo* virulence, and genomic  
60 stability in pulmonary alveolar macrophages and in a wild boar cell line.

61

## 62 **Material and methods**

### 63 **Expansion of viral stocks**

64 ASFV-Kenya-1033-IX was isolated from the spleen of an infected domestic pig from  
65 Busia district in western Kenya (Abworo *et al.*, 2017). The isolated virus was passaged  
66 twice in blood macrophages before adaptation to WSL cells at the Friedrich-Loeffler-  
67 Institute (FLI) where it underwent ~20 passages (p20) (Keil *et al.* 2014, Hübner *et al.*,  
68 2018).

69 The WSL-grown virus (p20) was transferred back to International Livestock Research  
70 Institute (ILRI) in Nairobi where it underwent two additional passages in WSL. For each  
71 passage, WSL cells were infected at 80% confluence with a multiplicity of infection  
72 (MOI) of 0.1 in either T25 or T75 flasks and incubated at 37°C and 5% CO<sub>2</sub> for 5-7  
73 days. Cells and supernatant were harvested from the flasks and cells lysed by

74 repeated freeze-thawing three times. The virus-rich supernatant was clarified by  
75 centrifugation at  $670 \times g_{AV}$  for 10 minutes and the clarified supernatant was aliquoted  
76 and stored at  $-80^{\circ}\text{C}$ . Stocks were titrated using  $\text{HAD}_{50}$  in pulmonary alveolar  
77 macrophage (PAM) cells or by  $\text{TCID}_{50}$  assay in WSL cells.

78 The macrophage grown virus stock of ASFV-Kenya-1033-IX underwent a total of four  
79 passages in blood macrophages. For each passage, blood macrophages were  
80 infected at MOI 0.1 in either T25 or T75 flasks and were incubated at  $37^{\circ}\text{C}$  and 5%  
81  $\text{CO}_2$  for 5-7 days. Cells and supernatant were harvested from the flasks and cells lysed  
82 by repeated freeze-thawing three times. The virus-rich supernatant was clarified by  
83 centrifugation at  $670 \times g_{AV}$  for 10 minutes and the clarified supernatant was aliquoted  
84 and stored at  $-80^{\circ}\text{C}$ . Stocks were titrated using  $\text{HAD}_{50}$  in PAM.

85

#### 86 **Purification of ASFV by sucrose gradient**

87 For whole-genome sequencing, the clarified supernatant containing ASFV was further  
88 purified using 36% sucrose gradient. The supernatant was transferred into autoclaved  
89 250ml flat-bottom ultracentrifuge tubes followed by centrifugation at  $18,500 \times g_{AV}$  for  
90 2h at  $4^{\circ}\text{C}$  to pellet the virus particles in a Beckman Coulter Avanti Centrifuge J-301.  
91 The pellet was resuspended in 3ml of 10mM Tris (pH9), and the virus suspension was  
92 layered on 36% sucrose solution and subjected to ultracentrifugation at  $30,000 \times g_{AV}$   
93 for 2h at  $4^{\circ}\text{C}$  using the Beckman Coulter Optima XE-90 ultracentrifuge. The pellet  
94 containing the purified virus was resuspended in 10 mM Tris [pH9] and aliquots stored  
95 at  $-80^{\circ}\text{C}$ .

96

97

## 98 **Whole-genome sequencing, genome assembly and Sanger sequencing**

99 DNA was extracted from the sucrose-purified virus using the Qiagen DNeasy blood  
100 and tissue kit (Qiagen) according to the manufacturer's protocol. Whole-genome  
101 sequencing was performed using the Illumina MiSeq platform at ILRI as described  
102 previously (Abkallo *et al.*, 2021).

103 Sequenced reads were trimmed to remove low confidence bases using Trimmomatic  
104 (release 0.38, (Bolger *et al.*, 2014)) with the following parameter settings:  
105 LEADING:10; TRAILING:10; SLIDINGWINDOW: 4:20; MINLEN:25. Host reads were  
106 eliminated by mapping the trimmed reads to the *Sus scrofa* genome (assembly 11.1)  
107 using Bowtie 2 aligner (v2.3.4.1, (Langmead and Salzberg, 2012)). *De novo* assembly  
108 was generated using Unicycler (v0.4.7, (Wick *et al.*, 2017)), which uses SPAdes  
109 assembler to generate *de novo* assemblies. The assembled contigs were annotated  
110 against Ken06.Bus (GenBank accession: KM111295, Bishop *et al.*, 2015) using RATT  
111 v1.0.3 (Otto *et al.*, 2011) with the strain preset parameters. Annotated genes were  
112 manually checked. Further improvement to the automated annotation was carried out;  
113 additional open reading frames were identified and annotated as putative genes if their  
114 homologues were present in published genomes; alternative transcripts were  
115 identified based on data published in Cackett *et al.*, 2020. (Cackett *et al.*, 2020).

116 To verify SNPs and indels in the whole genome sequence, loci of interest were  
117 amplified with respective primer pairs (Supplementary Table 1). The resulting  
118 amplicons were purified using High Pure PCR product purification kit (Roche) and  
119 shipped to Macrogen Europe B.V. (Amsterdam, Netherlands) for Sanger sequencing  
120 with the same primers. The sequences were then analyzed using SnapGene (GSL  
121 Biotech).

## 122 ***In vitro* viral growth kinetics**

123 WSL cells and blood pulmonary macrophages (PAMs) were infected with either the  
124 macrophage- or the WSL-grown virus stocks at different multiplicity of infection (MOI)  
125 and incubated at 37°C and 5% CO<sub>2</sub> in duplicate wells of a 24-well plate. After 2h  
126 incubation, cells were washed twice in 1× PBS to remove non-attached and non-  
127 internalized viruses, before resuspending the cells in complete medium (RPMI 1640  
128 (Sigma Aldrich) or DMEM (Sigma Aldrich) supplemented with 2mM L-glutamine  
129 (Sigma- Aldrich), 10% fetal bovine serum (FBS), 100UI/ml penicillin (Sigma Aldrich),  
130 100mg/ml streptomycin (Sigma Aldrich)). Cells and supernatant were harvested at 2,  
131 24, 48, 72 and 96 h after infection and frozen at -80°C till further analysis. After 3  
132 freeze-thaw cycles, viral titers were established using HAD<sub>50</sub> assay using PAM cells.  
133 Viral titers in the supernatant were established on the same day for consistency in  
134 results.

135

## 136 ***In vivo* experiments**

137 All animal experimental work was approved by the ILRI Institutional Animal Care and  
138 Usage Committee (IACUC2019-05, IACUC2020-11 and IACUC2020-18). Animals did  
139 not have detectable ASFV in blood by qPCR or antibody responses to ASFV prior to  
140 the start of the experiment. Antibody responses were measured by the competitive  
141 p72 ELISA (Ingezim PP3 COMPAC, Ingenesa). Animals were inoculated by  
142 intramuscular injection in the neck with 1 or 10<sup>2</sup> HAD<sub>50</sub> of the blood macrophage-grown  
143 or 10<sup>2</sup> TCID<sub>50</sub> of the WSL-grown virus stock. Animal experiments were performed as  
144 separate experiments. Infected animals were monitored daily, and clinical scoring was  
145 performed daily according to King *et al* (King *et al.*, 2011). Animals were euthanized

146 using a barbiturate overdose when the humane endpoint criteria were reached. Blood  
147 samples and nasal swabs were taken on day 0, 3, 5, 7 post infection. Tissue samples  
148 were obtained at post-mortem investigation for the determination of viral titers in  
149 tissue.

150

#### 151 **Determination of viral titers by HAD<sub>50</sub>**

152 Virus titration was performed on pulmonary alveolar macrophages (PAM) in 96-well  
153 plates as described previously (Enjuanes *et al.* 1976). Virus culture and dilutions were  
154 performed using complete RPMI media (described above) and presence of virus was  
155 assessed by hemadsorption. Viral titers were calculated by the Reed and Muench  
156 method (Reed & Muench 1938).

157

#### 158 **Determination of viral titers by p72/B646L qPCR**

159 p72/B646L qPCR was used to assess the virus content in tissue samples. DNA was  
160 extracted from tissue using the Qiagen DNeasy blood and tissue kit (Qiagen)  
161 according to the manufacturer's protocol. qPCR was performed as per the OIE-  
162 recommended real-time PCR assay according to King *et al.* (2003), but primer and  
163 probe sequences were adapted to Genotype IX (Supplementary Table 1).

164

165

166

167

## 168 **Results**

### 169 ***In vitro* growth of blood macrophage-grown vs WSL-grown ASFV-Kenya-1033-** 170 **IX**

171 Viral growth kinetics were determined in both PAM and WSL to assess the efficiency  
172 of infection and expansion of the different viral stocks (blood macrophage-grown and  
173 WSL-grown viruses). PAMS were infected with an MOI of 0.01 of the two virus stocks  
174 and a wash step was performed after 2h. Similar growth was seen for the two stocks  
175 in PAM, with final titers of approximately  $5 \times 10^6$  HAD<sub>50</sub>/ml for both the macrophage-  
176 grown stock and the WSL-grown virus after 96 hours (Figure 1a). Growth in WSL cells  
177 was less efficient for both viral stocks, with detectable virus only being observed after  
178 96h when using an MOI 0.01 and having a wash step after 2h. However, when an MOI  
179 of 1 was used (Figure 1b), growth was observed from 24h to 48h after infection with  
180 similar growth curves for the two viruses. However, when different MOIs were used  
181 without a wash step after 2h, high viral titer could be obtained after 4 days of culture  
182 for both the macrophage-grown and the WSL-grown stock, up to  $1 \times 10^{12}$  HAD<sub>50</sub>/ml  
183 (Figure 1c).

184

### 185 **Virulence of blood macrophage-grown vs WS-grown ASFV-Kenya-1033-IX**

186 To investigate if the growth of the virus in different cell types affected the  
187 virulence/pathogenicity of the virus *in vivo*, animals were infected by intramuscular  
188 infection with 1 HAD<sub>50</sub> or  $10^2$  HAD<sub>50</sub> macrophage-grown ASFV-Kenya-1033-IX or  $10^2$   
189 HAD<sub>50</sub> WSL-grown ASFV-Kenya-1033-IX. Both the macrophage-grown and the WSL-  
190 grown virus stocks were highly pathogenic *in vivo*. All animals developed severe  
191 clinical signs compatible with ASF and reached the humane endpoint criteria between



192 day 5 and 8 post infection. However, a delay was observed in animals inoculated with  
193 1 HAD<sub>50</sub> of the blood macrophage-grown stock and reached their humane endpoint  
194 between day 9 and day 16 after infection (Figure 2). There was no statistical difference  
195 between the 10<sup>2</sup> HAD<sub>50</sub> macrophage-grown and the 10<sup>2</sup> HAD<sub>50</sub> WSL-grown ASFV-  
196 Kenya-IX-1033 viruses in time to humane endpoint and clinical scores (Figure 2a-b).  
197 There was also no statistical difference in HAD<sub>50</sub> titers in blood and viral titers in tissues  
198 as determined by qPCR (Figure 3).

199

## 200 **Whole genome comparison of blood macrophage grown vs WSL-grown ASFV-** 201 **Kenya-1033-IX**

202 As there were limited *in vitro* and *in vivo* differences between the macrophage-grown  
203 and WSL-grown ASFV-Kenya-1033-IX stocks, whole-genome sequencing was  
204 performed to establish the degree of genomic changes between the stocks. DNA from  
205 macrophage- and WSL-grown viruses was sequenced on an Illumina MiSeq which  
206 yielded 2.9 M and 3.3 M paired end reads, respectively. After the removal of short, low  
207 confidence reads and reads belonging to the host, about 700,000 (13.3%) and 1.2 M  
208 (18.8%) reads remained, which were assembled *de novo*. Both the macrophage- and  
209 WSL-grown virus genomes assembled into two contigs, the total bases assembled  
210 being 182,424 bp and 182,038 bp, respectively. The two contigs were separated by a  
211 break of 293 bp and 678 bp in the N-terminal region of the CD2v gene in the two  
212 genomes, respectively. To check whether the contig break was due to a deletion in  
213 the virus DNA or an anomaly arising from the sequencing, we designed PCR primers  
214 flanking the suspected breaks (Supplementary Table 1) and sequenced the resulting

215 amplicons by the Sanger method, confirming that there was no deletion in the virus  
216 genome at the CD2v locus.

217 A high level of sequence identity (>99% nucleotide identity) between the two ASFV-  
218 Kenya-IX-1033 stocks was observed across the genome, with just four single  
219 nucleotide polymorphisms (SNPs) present in the aligned regions (Table 1). Of the four  
220 SNPs, one was in a polyG tract in the intergenic region between MGF 360-7L and  
221 X69R genes. Three SNPs were in coding regions; two were non-synonymous  
222 mutations resulting in an Alanine to Threonine conversion in MGF 505-2R and D250R  
223 (g5R) genes. The other mutation was a synonymous mutation in the I329L (k11L)  
224 gene. The SNPs in coding regions were confirmed by Sanger sequencing of PCR  
225 products targeting the regions of interest (Supplementary Table 1 for primers used).  
226 The two genomes of the ASFV-Kenya-1033-IX stocks were annotated based on  
227 Ken06.Bus strain (Bishop *et al.*, 2015), which had 99% sequence similarity to the  
228 stocks. The Ken06.Bus strain has 161 annotated genes; 159 of the genes were  
229 present in the ASFV-Kenya-IX-1033 stocks. Genes annotated as MGF 110-11L  
230 (FRAG-2) and MGF 110-12L were absent in the ASFV-Kenya-IX-1033 stocks. In  
231 addition to annotation transfer from Ken06.Bus, five additional coding sequences were  
232 identified and annotated in the genomes, based on sequence similarity with putative  
233 novel genes described in the reannotation of the genotype I strain, BA71V, which is  
234 currently the most comprehensively annotated ASFV genome (Cackett *et al.*, 2020).  
235 Sequence data generated for macrophage-grown and WSL-grown ASFV virus in this  
236 study were submitted to GenBank under SRA accessions SRR17226616 and  
237 SRR15187368 (Abkallo *et al.*, 2021), respectively.

238

## 239 Discussion

240 In Eastern Africa, multiple genotypes of ASFV are circulating concurrently, with  
241 genotype IX and X being responsible for most outbreaks. However, other genotypes  
242 such as genotype II and XV have also been found (Bishop *et al.*, 2015; Abworo *et al.*,  
243 2017; Norbert Mwiine *et al.*, 2019; Njau *et al.*, 2021; Peter *et al.*, 2021). Here, we  
244 describe the *in vitro* and *in vivo* characterization of ASFV-Kenya-1033-IX. The strain  
245 is highly pathogenic *in vivo* with 100% of experimental animals reaching their humane  
246 endpoint. At a dose of  $10^2$  HAD<sub>50</sub> animals reached the humane endpoint criteria  
247 between 5 and 8 days, and this was reproducible over several experiments. Even at  
248 a dose of 1 HAD<sub>50</sub> all animals reached the humane endpoint between 9 and 16-days  
249 post challenge.

250 Many different ASFV genotypes are circulating in Africa, but there is insufficient  
251 evidence to show if candidate African swine fever vaccines based on a particular  
252 genotype can provide protection against other genotypes. The establishment of a  
253 reliable challenge model for genotype IX ASF virus, as we are describing in this report,  
254 is key to testing candidate vaccines for especially the eastern African region, where  
255 this genotype is circulating. In addition, it might be desirable to isolate and establish  
256 challenge models for other ASFV genotypes circulating in Africa.

257 There are several candidate vaccines based on LA-ASFV, which show promising  
258 protection against homologous ASFV challenge with up to 100% protection. These  
259 LA-ASFV's are attenuated *in vivo* due to deletions of genes associated with virulence  
260 either by natural gene deletion or by genome modification. One of the challenges with  
261 the development of LA-ASFV is the difficulty of growing ASFV *in vitro*. ASFV is  
262 traditionally grown in primary cells, such as blood derived macrophages or pulmonary

263 alveolar macrophages. However, a continuously growing cell line for the growth of  
264 ASFV would allow better quality control and would limit the chances of introducing  
265 unwanted contaminants or pathogens. However, regular screening of continuously  
266 growing production cell lines for the presence of contaminants such as other pig  
267 pathogens are still warranted.

268 We used the WSL cell line for the replication of ASFV-Kenya-1033-IX, which is a fetal  
269 wild boar lung cell line. Viral titers of up to  $1 \times 10^{12}$  HAD<sub>50</sub>/ml was obtained using the  
270 WSL-grown stock. Decent viral titers for ASFV-Kenya-1033-IX gene-deleted viruses  
271 were also obtained (data not shown). This may be beneficial for commercial vaccine  
272 production as many doses can be produced using a relatively small volume of culture.

273 In previous studies, attempts to grow ASFV in Vero cells resulted in large deletions in  
274 the ASFV genome as the virus adapted to the cell line (Krug *et al.* 2015). In case of  
275 the Georgia isolate BA71, adaptation to Vero cells (BA71V) led to a non-virulent ASFV,  
276 which was associated with dramatic genomic changes between the BA71 and the  
277 BA71v stocks (Rodríguez *et al.*, 2015). Similarly, the adaptation of ASF-G-Δ177L to  
278 growth in Plum Island porcine epithelial cells (PIPEC) led to deletions of genes in the  
279 left variable region of the genome, namely seven genes of the MGF300 and MGF360  
280 family, and a fusion of MGF360-4L with MGF360-11L (ASF-G-Δ177L/ΔLVR). Further  
281 passages in PIPEC led to few point mutations in ORFs with more mutations observed  
282 outside ORFs. Thus, there is an ongoing effort to identify production cell lines, which  
283 support both the replication of ASFV and genomic stability, e.g., relatively high levels  
284 of ASFV were seen using the pig macrophage cell line ZMAC and the Green Monkey  
285 epithelial cell line MA-104 (Portugal *et al.* 2020, Rai *et al.* 2021). Results from the  
286 present study indicate that WSL also supports replication of ASFV while maintaining  
287 genomic stability. Few genomic changes were seen in ASFV-Kenya-1033-IX grown in

288 WSL compared to ASFV-Kenya-1033-IX grown in blood macrophages. The WSL  
289 grown ASFV-Kenya-1033-IX was used as a backbone for the introduction of gene  
290 modifications using CRISPR/Cas9 technology for the development of candidate live-  
291 attenuated vaccines (Abkallo *et al.* 2021). Even after the development of candidate  
292 gene-deleted LA-ASFVs, which undergo additional passages to obtain pure clones,  
293 only few genomic changes were observed, indicating that the genome of ASF-Kenya-  
294 1033-IX is indeed very stable in WSL (Abkallo *et al.* 2021). The few genomic changes  
295 could be random changes as mutations happen for any pathogen over generations or  
296 they could be due to adaptation to the cell line used for growth of the virus. To know if  
297 the mutations are adaptations, repeated adaptation and genome analysis would be  
298 needed. However, in this study the aim was to confirm whether WSL cell line supports  
299 the genomic stability of ASFV-Kenya-1033-IX.

300 Despite WSL supporting *in vitro* growth of ASFV-Kenya1033-IX, the kinetics of this  
301 growth is different from the growth in PAM. The same was seen by Sanchez *et al.*,  
302 who investigated the growth of different African swine fever virus strains in PAM and  
303 WSL (Sánchez *et al.*, 2017). The initial viral titers in WSL were lower, however after  
304 96 h similar titers were seen in WSL and PAMs. Sanchez *et al.* investigated surface  
305 expression of selected membrane proteins in different cell lines using antibodies  
306 against CD14, CD163, CD169, SLAI, SLAII and SWC3. Most PAMS (>60% of cells)  
307 were positive for all these markers, while the proportion of positive cells was lower for  
308 CD14, CD163 and CD169 for WSL (Sánchez *et al.*, 2017). This would suggest that  
309 the expression of some of these markers could be relevant for the infection/replication  
310 of ASFV *in vitro*, although several other un-investigated markers may differ between  
311 these cell types. As WSL is a wild boar cell line, there could also be some sequence  
312 differences in the molecules accounting for some of the differences seen.

313 Keßler *et al.* investigated differences in the intracellular ASFV proteome after infection  
314 of different cell lines (WSL-HP, HEK293 or Vero) and found considerable differences  
315 in the top-ranking viral proteins depending on the infected cells (Keßler *et al.*, 2018).  
316 Thus, this could explain the differences in growth in WSL or PAM. Complementing the  
317 analysis with transcriptome and/or proteome analysis of both viral and host factors to  
318 understand viral host interactions would be of interest. Deciphering the viral and host  
319 factors relevant for *in vitro* growth could allow for targeting of genes for better *in vitro*  
320 growth. For example, growth of influenza virus in avian cells with reduced expression  
321 of one or more IFITM genes leads to improved growth of influenza viruses in cell  
322 culture (Smith *et al.*, 2013).

323 In all, the Kenyan ASFV isolate ASFV-Kenya1033-IX is a highly virulent virus. The  
324 genome is stable in WSL cells and the WSL grown virus retains virulence *in vivo*.  
325 High titers can be obtained in WSL cells, which is promising for future production of  
326 vaccine candidates.

327

## 328 **Acknowledgements**

329 We thank ILRI farm unit staff and Milton Owido for sampling and animal care during  
330 the animal experiments. We thank FLI for providing the WSL cell line and for adapting  
331 the ASFV-Kenya-IX-1033 for growth in WSL. We also thank Sam Oyola for  
332 sequencing the DNA on the MiSeq system.

333 This work was funded by the Canadian International Development Research Centre  
334 (IDRC) Livestock Vaccine Innovation Fund (LVIF) grant no. 108514-002 (phase I) and  
335 grant no.109212-001 (phase II), GALVMED grant no. ILR-R39A0752S4 and the  
336 CGIAR Research Program on Livestock and the CGIAR Consortium.

337

## 338 **References**

- 339 **Abkallo, H. M., Svitek, N., Oduor, B., Awino, E., Henson, S. P., Oyola, S. O., Mwalimu, S., Assad-**  
340 **Garcia, N., Fuchs, W., Vashee, S. and Steinaa, L.** (2021). Rapid CRISPR/Cas9 Editing of  
341 Genotype IX African Swine Fever Virus Circulating in Eastern and Central Africa. *Frontiers in*  
342 *Genetics* **12**, 1–11. doi: 10.3389/fgene.2021.733674.
- 343 **Bishop, R. P., Fleischauer, C., de Villiers, E. P., Okoth, E. A., Arias, M., Gallardo, C. and Upton,**  
344 **C.** (2015). Comparative analysis of the complete genome sequences of Kenyan African swine  
345 fever virus isolates within p72 genotypes IX and X. *Virus Genes* **50**, 303–309. doi:  
346 10.1007/s11262-014-1156-7.
- 347 **Blome, S., Gabriel, C. and Beer, M.** (2014). Modern adjuvants do not enhance the efficacy of an  
348 inactivated African swine fever virus vaccine preparation. *Vaccine* **32**, 3879–3882. doi:  
349 10.1016/j.vaccine.2014.05.051.
- 350 **Bolger, A. M., Lohse, M. and Usadel, B.** (2014). Trimmomatic: A flexible trimmer for Illumina  
351 sequence data. *Bioinformatics* **30**, 2114–2120. doi: 10.1093/bioinformatics/btu170.
- 352 **Borca, M. V., Holinka, L. G., Berggren, K. A. and Gladue, D. P.** (2018). CRISPR-Cas9, a tool to  
353 efficiently increase the development of recombinant African swine fever viruses. *Scientific*  
354 *Reports* **8**, 1–6. doi: 10.1038/s41598-018-21575-8.
- 355 **Borca, M. V., Ramirez-Medina, E., Silva, E., Vuono, E., Rai, A., Pruitt, S., Holinka, L. G.,**  
356 **Velazquez-Salinas, L., Zhu, J. and Gladue, D. P.** (2020). Development of a Highly Effective  
357 African Swine Fever Virus Vaccine by Deletion of the I177L Gene Results in Sterile Immunity  
358 against the Current Epidemic Eurasia Strain. *Journal of Virology* **94**,. doi: 10.1128/jvi.02017-19.
- 359 **Borca, M. V., Rai, A., Ramirez-Medina, E., Silva, E., Velazquez-Salinas, L., Vuono, E., Pruitt, S.,**  
360 **Espinoza, N. and Gladue, D. P.** (2021). A Cell Culture-Adapted Vaccine Virus against the  
361 Current African Swine Fever Virus Pandemic Strain. *Journal of Virology* **95**,. doi:  
362 10.1128/jvi.00123-21.

- 363 **Cackett, G., Matelska, D., Sýkora, M., Portugal, R., Malecki, M., Bähler, J., Dixon, L. and Werner,**  
364 **F.** (2020). The African Swine Fever Virus Transcriptome. *Journal of Virology* **94**,. doi:  
365 10.1128/jvi.00119-20.
- 366 **Enjuanes, L., Carrascosa, A.L., Moreno, M.A., Viñuela, E.J.** (1976). Titration of African swine  
367 fever (ASF) virus. *Gen. Virol.* **32**, 471-7. doi: 10.1099/0022-1317-32-3-471.
- 368 **Hakizimana, J. N., Yona, C., Kamana, O., Nauwynck, H. and Misinzo, G.** (2021). African swine  
369 fever virus circulation between tanzania and neighboring countries: A systematic review and  
370 meta-analysis. *Viruses* **13**,. doi: 10.3390/v13020306.
- 371 **Hübner, A., Petersen, B., Keil, G. M., Niemann, H., Mettenleiter, T. C. and Fuchs, W.** (2018).  
372 Efficient inhibition of African swine fever virus replication by CRISPR/Cas9 targeting of the viral  
373 p30 gene (CP204L). *Scientific Reports* **8**,. doi: 10.1038/s41598-018-19626-1.
- 374 **Keil, G.M., Giesow, K., Portugal, R.** (2014). A novel bromodeoxyuridine-resistant wild boar lung cell line  
375 facilitates generation of African swine fever recombinants. *Arch Virol.***159**, 2421-8. doi:  
376 10.1007/s00705-014-2095-2.
- 377 **Keßler, C., Forth, J. H., Keil, G. M., Mettenleiter, T. C., Blome, S. and Karger, A.** (2018). The  
378 intracellular proteome of African swine fever virus. *Scientific Reports* **8**, 1–9. doi:  
379 10.1038/s41598-018-32985-z.
- 380 **King, D.P., Reid, S.M., Hutchings, G.H., Grierson, S.S., Wilkinson, P.J., Dixon, L.K., Bastos,**  
381 **A.D., Drew, T.W.** (2003). Development of a TaqMan PCR assay with internal amplification  
382 control for the detection of African swine fever virus. *J. Virol. Methods* **107**, 53-61
- 383 **King, K., Chapman, D., Argilaguët, J. M., Fishbourne, E., Hutet, E., Cariolet, R., Hutchings, G.,**  
384 **Oura, C. A. L., Netherton, C. L., Moffat, K., Taylor, G., Le Potier, M. F., Dixon, L. K. and**  
385 **Takamatsu, H. H.** (2011). Protection of European domestic pigs from virulent African isolates of  
386 African swine fever virus by experimental immunisation. *Vaccine* **29**, 4593–4600. doi:  
387 10.1016/j.vaccine.2011.04.052.
- 388 **Krug, P. W., Holinka, L. G., O'Donnell, V., Reese, B., Sanford, B., Fernandez-Sainz, I., Gladue, D.**  
389 **P., Arzt, J., Rodriguez, L., Risatti, G. R. and Borca, M. V.** (2015). The Progressive Adaptation  
390 of a Georgian Isolate of African Swine Fever Virus to Vero Cells Leads to a Gradual Attenuation



- 391 of Virulence in Swine Corresponding to Major Modifications of the Viral Genome. *Journal of*  
392 *Virology* **89**, 2324–2332. doi: 10.1128/jvi.03250-14.
- 393 **Langmead, B. and Salzberg, S. L.** (2012). Fast gapped-read alignment with Bowtie 2. *Nature*  
394 *Methods* **9**, 357–359. doi: 10.1038/nmeth.1923.
- 395 **Monteagudo, P. L., Lacasta, A., López, E., Bosch, L., Collado, J., Pina-pedrero, S., Correa-fiz, F.**  
396 **and Accensi, F.** (2017). BA71ΔCD2: a New Recombinant Live Attenuated African Swine Fever Virus  
397 with Cross-Protective Capabilities *Journal of Virology* **91**, 1-17.
- 398 **O'Donnell, V., Holinka, L. G., Gladue, D. P., Sanford, B., Krug, P. W., Lu, X., Arzt, J., Reese, B.,**  
399 **Carrillo, C., Risatti, G. R. and Borca, M. V.** (2015). African Swine Fever Virus Georgia Isolate  
400 Harboring Deletions of MGF360 and MGF505 Genes Is Attenuated in Swine and Confers  
401 Protection against Challenge with Virulent Parental Virus. *Journal of Virology* **89**, 6048–6056.  
402 doi: 10.1128/jvi.00554-15.
- 403 **OIE 2007:** African swine fever (ASF) confirmed in Georgia. [https://www.oie.int/en/african-swine-fever-](https://www.oie.int/en/african-swine-fever-asf-confirmed-in-georgia/)  
404 [asf-confirmed-in-georgia/](https://www.oie.int/en/african-swine-fever-asf-confirmed-in-georgia/) Accessed on 14 December 2021.
- 405 **Otto, T. D., Dillon, G. P., Degraeve, W. S. and Berriman, M.** (2011). RATT: Rapid Annotation  
406 Transfer Tool. *Nucleic Acids Research* **39**, 1–7. doi: 10.1093/nar/gkq1268.
- 407 **Popescu, L., Gaudreault, N. N., Whitworth, K. M., Murgia, M. V., Nietfeld, J. C., Mileham, A.,**  
408 **Samuel, M., Wells, K. D., Prather, R. S. and Rowland, R. R. R.** (2017). Genetically edited pigs  
409 lacking CD163 show no resistance following infection with the African swine fever virus isolate,  
410 Georgia 2007/1. *Virology* **501**, 102–106. doi: 10.1016/j.virol.2016.11.012.
- 411 **Rai, A., Pruitt, S., Ramirez-Medina, E., Vuono, E.A., Silva, E., Velazquez-Salinas, L.,**  
412 **Carrillo, C., Borca, M.V., Gladue, D.P.** (2021). Detection and Quantification of African  
413 Swine Fever Virus in MA-104 Cells. *Bio Protocol* **11**, 6: e3955.
- 414 **Reis, A. L., Abrams, C. C., Goatley, L. C., Netherton, C., Chapman, D. G., Sanchez-Cordon, PP.**  
415 **and Dixon, L. K.** (2016). Deletion of African swine fever virus interferon inhibitors from the  
416 genome of a virulent isolate reduces virulence in domestic pigs and induces a protective  
417 response. *Vaccine* **34**, 4698–4705. doi: 10.1016/j.vaccine.2016.08.011.

- 418 **Reis, A. L., Goatley, L. C., Jabbar, T., Sanchez-Cordon, P. J., Netherton, C. L., Chapman, D. G.**  
419 **D. A. G. and Dixon, L. K.** (2017). Deletion of the African Swine Fever Virus Gene DP148R  
420 Does Not Reduce Virus Replication in Culture but Reduces Virus Virulence in Pigs and Induces  
421 High Levels of Protection against Challenge. *Journal of Virology* **91**, 1–16. doi:  
422 10.1128/jvi.01428-17.
- 423 **Rodríguez, J. M., Moreno, L. T., Alejo, A., Lacasta, A., Rodríguez, F. and Salas, M. L.** (2015).  
424 Genome sequence of african swine fever virus BA71, the virulent parental strain of the  
425 nonpathogenic and tissue-culture adapted BA71V. *PLoS ONE* **10**, 1–22. doi:  
426 10.1371/journal.pone.0142889.
- 427 **Sánchez-Cordón, P. J., Jabbar, T., Berrezaie, M., Chapman, D., Reis, A., Sastre, P., Rueda, P.,**  
428 **Goatley, L. and Dixon, L. K.** (2018). Evaluation of protection induced by immunisation of  
429 domestic pigs with deletion mutant African swine fever virus Benin $\Delta$ MGF by different doses and  
430 routes. *Vaccine* **36**, 707–715. doi: 10.1016/j.vaccine.2017.12.030.
- 431 **Sánchez-Torres, C., Gómez-Puertas, P., Gómez-Del-Moral, M., Alonso, F., Escribano, J. M.,**  
432 **Ezquerro, A. and Domínguez, J.** (2003). Expression of porcine CD163 on  
433 monocytes/macrophages correlates with permissiveness to African swine fever infection.  
434 *Archives of Virology* **148**, 2307–2323. doi: 10.1007/s00705-003-0188-4.
- 435 **Sánchez, E. G., Riera, E., Nogal, M., Gallardo, C., Fernández, P., Bello-Morales, R., López-**  
436 **Guerrero, J. A., Chitko-Mckown, C. G., Richt, J. A. and Revilla, Y.** (2017). Phenotyping and  
437 susceptibility of established porcine cells lines to African Swine Fever Virus infection and viral  
438 production. *Scientific Reports* **7**, 1–13. doi: 10.1038/s41598-017-09948-x.
- 439 **Smith, S. E., Gibson, M. S., Wash, R. S., Ferrara, F., Wright, E., Temperton, N., Kellam, P. and**  
440 **Fife, M.** (2013). Chicken Interferon-Inducible Transmembrane Protein 3 Restricts Influenza  
441 Viruses and Lyssaviruses In Vitro . *Journal of Virology* **87**, 12957–12966. doi: 10.1128/jvi.01443-  
442 13.
- 443 **Wagstaffe, H. R., Mooney, J. P., Riley, E. M. and Goodier, M. R.** (2018). Vaccinating for natural  
444 killer cell effector functions. *Clinical and Translational Immunology* **7**, 1–12. doi:  
445 10.1002/cti2.1010.

446 **Wick, R. R., Judd, L. M., Gorrie, C. L. and Holt, K. E.** (2017). Unicycler: Resolving bacterial genome  
447 assemblies from short and long sequencing reads. *PLoS Computational Biology* **13**, 1–22. doi:  
448 10.1371/journal.pcbi.1005595.

449

450

451

452

453

454

455

456

457

458

459

460

461

462

463

464

465

466

467

468

469

470

471

472

473

474

475

476

477  
478  
479  
480  
481  
482  
483  
484

**Table 1.** Single nucleotide polymorphisms (SNPs) (underlined) between blood macrophage- and WSL-grown virus that were present in genes.

| <b>Gene name</b> | <b>Genomic position<sup>1</sup></b> | <b>Macrophage-grown</b> | <b>WSL-grown</b>   |
|------------------|-------------------------------------|-------------------------|--------------------|
| MGF 505-2R       | 31,813 bp                           | <u>G</u> CC (Ala)       | <u>A</u> CC (Thr)  |
| D250R (g5R)      | 134,861 bp                          | <u>G</u> CA (Ala)       | <u>A</u> CA (Thr)  |
| I329L (k11L)     | 169,859 bp                          | AC <u>G</u> (Thr)       | ACA <u>A</u> (Thr) |

485 <sup>1</sup> Genomic position is given relative to Ken06.Bus (GenBank accession: KM111295.1)

486  
487  
488  
489  
490  
491  
492  
493  
494  
495  
496  
497  
498  
499  
500  
501  
502  
503  
504  
505  
506  
507  
508

509  
510  
511  
512  
513  
514  
515  
516  
517  
518  
519  
520  
521  
522  
523  
524  
525  
526  
527  
528  
529  
530  
531  
532  
533  
534  
535  
536  
537  
538  
539  
540  
541

## FIGURE 1

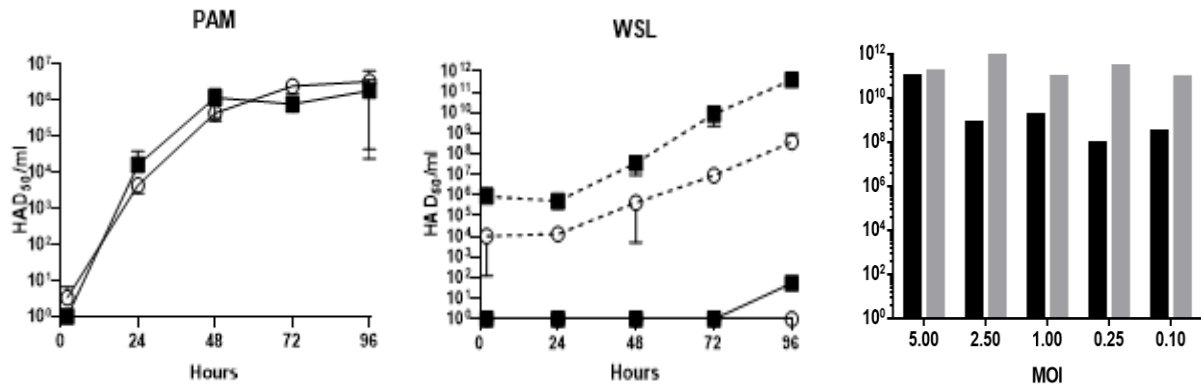

**Figure 1.** Viral growth kinetics of WSL-grown (■) or blood macrophage-grown (○) ASFV-Kenya-1033-IX in WSL and PAM. Viral titers were determined in HAD<sub>50</sub> assay. (A and B). Cells were infected with MOI 0.01 (continuous line) or MOI 1 (dashed line) of the virus stocks. Washing was performed after 2h and samples were collected at the different timepoints (0/2,24,48,72 and 96h post infection). (C) Macrophage-grown (black bars) and WSL-grown (grey bars) ASFV-Kenya-1033-IX grown in WSL cells for 4 days. Different MOI were used as indicated.

542

543

544 **FIGURE 2**

545

546

547

548

549

550

551

552

553

554

555

556

557

558

559

560

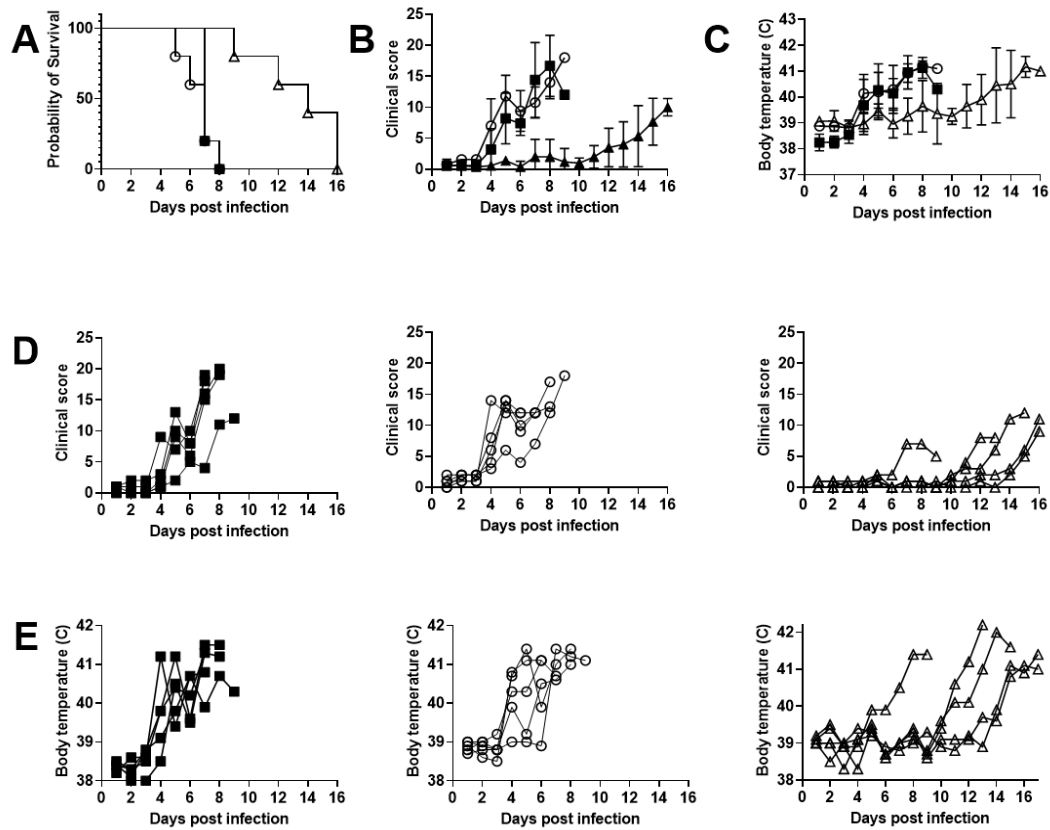

561 **Figure 2.** (A) The survival, (B) Mean clinical scores and (C) Mean body temperatures after inoculation  
562 with 10<sup>2</sup> HAD<sub>50</sub> of WSL grown virus (▪), 10<sup>2</sup> HAD<sub>50</sub> blood macrophage grown virus (○) or 1 HAD<sub>50</sub> blood  
563 macrophage grown virus (△). (D) Individual clinical scoring data and (E) body temperatures for the  
564 animals in the different groups.

565

566

567

568

569

570

571

572

573

574

575

576 **FIGURE 3**

577

578

579

580

581

582

583

584

585

586

587

588

589

590

591 **Figure 3.** (A) Mean virus titers in pig serum after inoculation with  $10^2$  HAD<sub>50</sub> of WSL grown virus (▪),  $10^2$   
592 HAD<sub>50</sub> blood macrophage grown virus (○) or 1 HAD<sub>50</sub> blood macrophage grown virus (Δ). HAD<sub>50</sub> titers  
593 in serum, the geometrical mean with the geometrical standard deviation is displayed; (B) Ct values  
594 obtained by qPCR using DNA extracted from tissues obtained at postmortem from spleen, gastro-  
595 hepatic lymph node (GLN) or mesenteric lymph node (MLN); (C) Individual HAD<sub>50</sub> titers in serum.

596

597

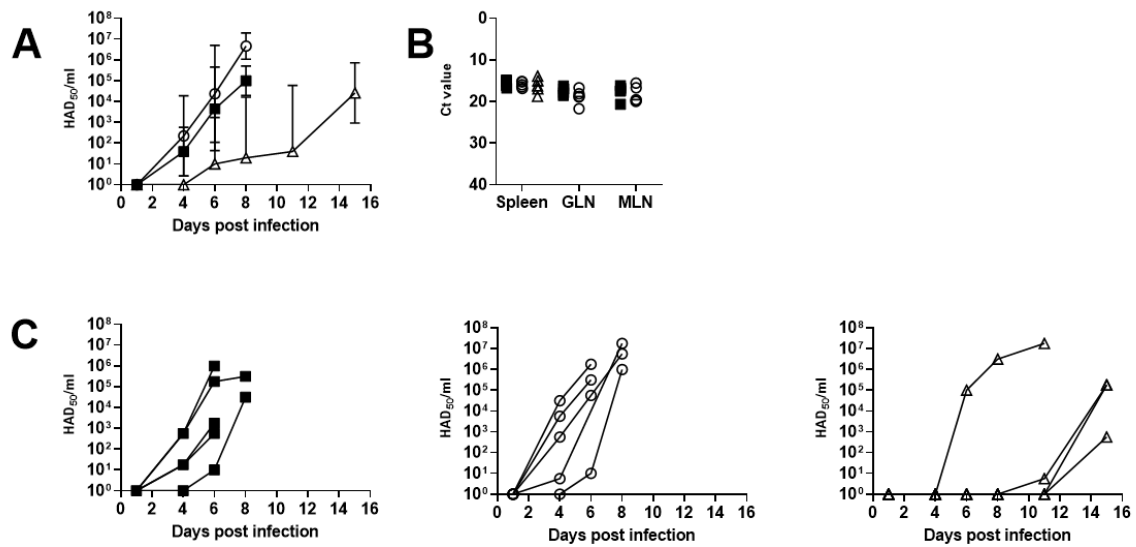

Source: https://www.biorxiv.org/content/10.1101/2021.12.15.472778v1.full.pdf
